# Supplementary material for: Electrophysiology and morphology of human cortical supragranular pyramidal cells in a wide age range
Source: eLife. 2025 Mar 28;13:RP100390. doi: 10.7554/eLife.100390 (PMC11952751; doi:10.7554/eLife.100390)
Supplement: Supplementary file 1. [file elife-100390-supp1.xlsx]

## Sheet: Sheet1
Age (years)	Sex	Brain region	Hemisphere	Surgical procedure
0.66	female	temporal	right	tumor removal
0.08	male	temporal	right	shunt
0.28	male	occipital	left	shunt
0.1	female	frontal	left	tumor removal
0.23	male	parietal	right	shunt
0.67	male	frontal	left	shunt
2	male	frontal	left	shunt
1	female	frontal	right	shunt
4	male	temporal	left	tumor removal
5	female	parietal	right	tumor removal
2	male	parietal	right	shunt
2	female	parietal	right	shunt
1	female	temporo-occipita	left	shunt
7	male	frontal	right	tumor removal
7	male	parietal	right	tumor removal
10	male	frontal	left	tumor removal
10	female	frontal	left	tumor removal
11	female	frontal	right	tumor removal
11	male	temporal	left	shunt
10	male	temporal	right	other
13	female	frontal	right	tumor removal
16	male	parieto-occipital	right	tumor removal
18	male	frontal	right	tumor removal
18	female	temporal	left	tumor removal
19	male	occipital	right	shunt
19	female	frontal	right	tumor removal
19	male	parietal	right	shunt
16	male	temporal	right	tumor removal
13	female	temporal	right	other
15	female	frontal	right	shunt
15	female	occipital	left	shunt
19	female	frontal	right	tumor removal
28	female	frontal	right	tumor removal
27	female	frontal	right	other
20	male	temporal	right	tumor removal
30	female	frontal	right	shunt
25	female	occipital	right	shunt
29	female	temporal	left	other
25	female	fronto-temporal	left	tumor removal
23	female	temporal	right	other
26	female	frontal	right	shunt
30	male	frontal	left	tumor removal
21	female	frontal	right	shunt
35	male	temporal	right	tumor removal
35	female	temporo-occipita	left	tumor removal
39	female	frontal	left	tumor removal
36	male	temporal	left	tumor removal
32	male	temporal	right	tumor removal
33	male	frontal	right	shunt
34	male	parietal	left	tumor removal
20	male	frontal	right	shunt
30	female	frontal	right	tumor removal
26	female	parietal	left	tumor removal
20	male	temporal	right	tumor removal
45	male	parietal	right	shunt
45	female	frontal	right	tumor removal
41	male	temporal	right	shunt
53	male	temporal	right	tumor removal
55	female	temporal	left	tumor removal
43	male	temporal	right	tumor removal
51	female	frontal	right	other
46	female	parietal	right	shunt
58	male	temporal	left	tumor removal
57	female	temporal	right	tumor removal
58	female	temporal	left	tumor removal
47	female	frontal	right	tumor removal
51	male	occipital	left	shunt
43	male	frontal	right	shunt
59	female	parietal	right	shunt
57	female	occipital	right	shunt
43	female	occipital	right	shunt
56	female	frontal	left	shunt
51	male	frontal	left	tumor removal
49	female	frontal	right	tumor removal
40	female	parietal	right	tumor removal
49	male	occipital	right	tumor removal
70	male	temporal	left	tumor removal
72	female	temporal	right	tumor removal
81	female	occipital	right	shunt
63	male	frontal	right	tumor removal
65	male	temporal	right	tumor removal
69	female	parietal	left	other
70	female	parietal	right	shunt
77	male	parietal	right	shunt
79	female	parietal	right	shunt
63	female	temporal	right	tumor removal
64	male	temporal	left	tumor removal
69	female	occipital	right	shunt
66	female	frontal	right	tumor removal
75	female	occipital	left	shunt
78	female	temporal	right	shunt
60	female	temporal	right	tumor removal
60	female	frontal	right	tumor removal
62	female	frontal	right	shunt
62	female	temporal	right	tumor removal
62	female	parietal	left	tumor removal
63	female	frontal	right	tumor removal
63	female	occipital	right	tumor removal
63	female	frontal	left	tumor removal
63	female	frontal	right	shunt
64	male	frontal	right	tumor removal
76	male	frontal	right	tumor removal
85	male	frontal	right	shunt
85	female	occipital	left	shunt
82	female	temporal	right	other
73	male	temporal	right	tumor removal
68	female	temporal	right	tumor removal
66	female	parietal	right	shunt
64	male	frontal	left	tumor removal
