# Supplementary material for: Electrophysiology and morphology of human cortical supragranular pyramidal cells in a wide age range
Source: eLife. 2025 Mar 28;13:RP100390. doi: 10.7554/eLife.100390 (PMC11952751; doi:10.7554/eLife.100390)
Supplement: Supplementary file 2. [file elife-100390-supp2.xlsx]

## Sheet: Sheet1
	Infant					Late adulthood
	#1 cell	#2 cell	#3 cell	Mean	SD	#1 cell	#2 cell	#3 cell	Mean	SD
Total spine number	3039	5883	4443	4455	1422.04	1909	2977	1553	2146.33	741.07
Apical spine number	2352	3256	3568	3058.67	631.56	1237	1282	849	1122.67	238.07
Basal spine number	687	2627	875	1396.33	1069.93	672	1695	704	1023.67	581.61
Mushroom	477	970	762	736.33	247.5	629	1085	407	707	345.66
Thin	1055	2157	1666	1626	552.09	455	680	403	512.67	147.23
Filopodia	732	1431	936	1033	359.45	223	154	105	160.67	59.28
Branched	31	62	53	48.67	15.95	5	1	2	2.67	2025-02-08
Stubby	67	99	84	83.33	2025-01-16	83	247	134	154.67	83.93
Not classified	677	1164	942	927.67	243.82	514	810	502	608.67	174.46
